# Supplementary material for: Duplication and relocation of the functional DPY19L2 gene within low copy repeats
Source: PubMed Central journal article supplement (PMC1475853; doi:10.1186/1471-2164-7-45), 2006-03-09

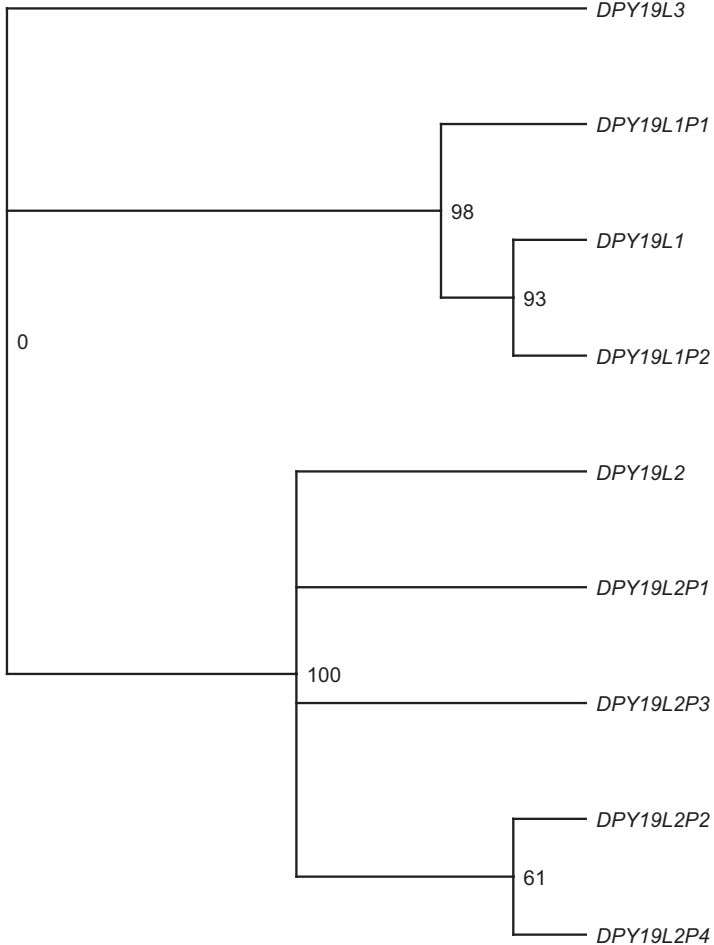

Supplement: 1471-2164-7-45-S5.pdf [file 1471-2164-7-45-S5.pdf]
