# Supplementary material for: Duplication and relocation of the functional DPY19L2 gene within low copy repeats
Source: PubMed Central journal article supplement (PMC1475853; doi:10.1186/1471-2164-7-45), 2006-03-09
Supplement: 1471-2164-7-45-S6.pdf [file 1471-2164-7-45-S6.pdf]

|                       |                        |                       |                                                                                                            |                                                                                                         |
|-----------------------|------------------------|-----------------------|------------------------------------------------------------------------------------------------------------|---------------------------------------------------------------------------------------------------------|
| DPY19L4               | <i>H. sapiens</i>      | 547                   | PRIMTGLMEIQEYYPDPTVELMTIKRQAPVAAVFAGSQPLMGAIKLCCTGWMVTSPLPLNDDDDLKRNNENYQIYSKRSAEDIYKILTSYKANYLIVDAIC      | 648                                                                                                     |
|                       | <i>P. troglodytes</i>  | 547                   | PRIMTGLMEIQEYYPDPTVELMTIKRQAPVAAVFAGSQPLMGVILKLCCTGWMVTSPLPLNDDDDLKRNNENYQIYSKRSAEDIYKILTSYKANYLIVDAIC     | 648                                                                                                     |
|                       | <i>C. familiaris</i>   | 541                   | PRIMTGLMEIQEYYPDPTVELMTIKRQAPVAAVFAGSQPLMGAIKLCCTGWMVTSPLPLNDDDDLKRNNENYQIYSKRSAEDIYKILTSYKANYLIVDAIC      | 642                                                                                                     |
|                       | <i>B. taurus</i>       | 547                   | PRIMTGLMEIQEYYPDPTVELMTIKRQAPVAAVFAGSQPLMGVILKLCCTGWMVTSPLPLNDDDDLKRNNENYQIYSKRSAEDIYKILTSYKASYLIVDAIC     | 648                                                                                                     |
|                       | <i>M. musculus</i>     | 546                   | PRITLTELTEIQEYYPDPTVELMTIKRQAPVAAVFAGSQPLMGVILKLCCTGWTVTSPLPLNSDDDDLQRNNENYQIYSKRSAEDIYKILTSYKANYLIVDAIC   | 647                                                                                                     |
|                       | <i>R. norvegicus</i>   | 546                   | PRITLTELTEIQEYYPDPTVELMTIKRQAPVAAVFAGSQPLMGVILKLCCTGWTVTSPLPLNSDDDDLKRNNENYQIYSKRSAEDIYKILTSYKANYLIVDAIC   | 647                                                                                                     |
|                       | <i>M. domestica</i>    | 504                   | PRIMTGLSEIQEYYPDPTVELMTIKRQAPVAAVFAGSQPLMGVILKLCCTGWMVTSPLPLNDDDDLKRNNENYQIYSKRSAEDIYKILTSYKANYLIVDAIC     | 605                                                                                                     |
|                       | <i>G. gallus</i>       | 544                   | PRIMTGLSEIQEYYPDPTVELMTIKRQAPVAAVFAGSQPLMGVILKLCCTGWMVSSLPLNDDDDLKRNNENYQIYSKRSAEDIYKILTSYKANFLIIDSIC      | 645                                                                                                     |
|                       | <i>X. tropicalis</i>   | 547                   | PRILALEELIEEHYESDPTVELMNIWIRTQAPINAVFAGSPAIVGIVRLCTGWMVTSPLPVNDEDEMRNNENYQIYSMRSAEDIYKILTSYKASYVVIDSIC     | 648                                                                                                     |
|                       | <i>T. nigroviridis</i> | 493                   | PRVLAELSLDIQEYYPDPIVELISIKSQAPASAVFAGSPLLGAIVKLVSGSALTSLPLVSDINLKRTEEDTVQVYGMKSAEEIYKILTSHTKNYVILBEAIC     | 594                                                                                                     |
| DPY19L3               | <i>T. rubripes</i>     | 502                   | PRVLAELSEIQEYYPDPTVELMNIWIRSQAPASAVFAGSPLLGAIVKLVSGSALTSLPLVSDINLKRRAEDTVQVYGMKSAEEIYKILTSQKTNVYVILBEAIC   | 603                                                                                                     |
|                       | <i>H. sapiens</i>      | 541                   | PGMDLSEIREFYDPDPTVELMNIINSNTPRKAVFAGSQMLAGVKLCTGRTLTNHPPHYEDSSRERTRAVYQIYAKRAPEVHALRSFGTDVYVILDSIC         | 642                                                                                                     |
|                       | <i>P. troglodytes</i>  | 541                   | PGMDLSEIREFYDPDPTVELMNIINSNTPRKAVFAGSQMLAGVKLCTGRTLTNHPPHYEDSSRERTRAVYQIYAKRAPEVHALRSFGTDVYVILDSIC         | 642                                                                                                     |
|                       | <i>C. familiaris</i>   | 541                   | PGMDLSEIREFYDPDPTVELMNIINSNTPRKAVFAGSQMLAGVKLCTGRTLTNHPPHYEDSSRERTRAVYQIYAKRSPEVHALRSFGTDVYVILDSIC         | 642                                                                                                     |
|                       | <i>B. taurus</i>       | 541                   | PGMDLSEIREFYDPDPTVELMNIINSNTPRKAVFAGSQMLAGVKLCTGRTLTNHPPHYEDSSRERTRAVYQIYAKRAPEVHALRSFGTDVYVILDSIC         | 642                                                                                                     |
|                       | <i>M. musculus</i>     | 541                   | PGMDLSEIREFYDPDPTVELMNIINSNTPRKAVFAGSQMLAGVKLCTGRTLTNHPPHYEDKSSRERTRAVYQIYAKRSPEVHALRSFGTDVYVILDSIC        | 642                                                                                                     |
|                       | <i>R. norvegicus</i>   | 541                   | PGMDLSEIREFYDPDPTVELMNIINSNTPRKAVFAGSQMLAGVKLCTGRTLTNHPPHYEDKSSRERTRAVYQIYAKRSPEVHALRSFGTDVYVILDSIC        | 642                                                                                                     |
|                       | <i>M. domestica</i>    | 533                   | PGMDLSEIREFYDPDPTVELMNIINSNTPRKAVFAGSQMLAGVKLCTGRTLTNHPPHYEDKSSRERTRAVYQIYAKRSPEVHALRSFGTDVYVILDSIC        | 642                                                                                                     |
|                       | <i>G. gallus</i>       | 539                   | PGMDLLEIREFYDPDPTVELMNIKSNTPTAVFAGSQMLAGVKLCTGRTLTNHPPHYEDKHSRERTRAVYQIYAKRSPEVYRILRSFGTDVYVILDSIC         | 640                                                                                                     |
|                       | <i>X. tropicalis</i>   | 537                   | PRIMEGLSEIREFYDPDPTVELMNIWIKLNTPKNAVAVFAGSQMLAGVKLCTGRTLTNHPPHYEDKTSRERTRAVYQIYANRSPEDVHSILRSFGTDVYVILDSIC | 638                                                                                                     |
| DPY-19                | <i>T. nigroviridis</i> | 506                   | PALMAELSEIREFYDPDPTVELMNIISTKTPKHAVFAGSQMLAGIKLCTGRTLTNHPPHYEDKDRERTRAVYQIYANRSPEDVHSILRSFGTDVYVILDSIC     | 607                                                                                                     |
|                       | <i>T. rubripes</i>     | 504                   | PVIMEGLSEIREFYDPDPTVELMNIISTKTPQHAVFAGSQMLAGIKLCTGRTLTNHPPHYEDKDRERTRAVYQIYANRSPEDVHSILRSFGTDVYVILDSIC     | 605                                                                                                     |
|                       | <i>C. elegans</i>      | 520                   | PNIRQLNVKGEYSNPDEMLFDIYQHNKQDAVFACTMPVAVNKLTLRLPIVNHPPHYEHVGRERTRAVYQIYANRSPEDVHSILRSFGTDVYVILDSIC         | 621                                                                                                     |
|                       | <i>C. intestinalis</i> | 563                   | GNLTHQWNIIGEFENLPQEBELIENINENLPKTAVFAGAMPYASIKLSCLRPIVNHPPHYEDAGRERTRAVYQIYANRSPEDVHSILRSFGTDVYVILDSIC     | 664                                                                                                     |
|                       | <i>T. nigroviridis</i> | 570                   | ANLQAQWAIIGEFENLPQEBELIENILENTQPNNAVAVFAGAMPYASVKLSTGRPIVNHPPHYEDAGRERTRAVYQIYANRSPEDVHSILRSFGTDVYVILDSIC  | 671                                                                                                     |
|                       | <i>T. rubripes</i>     | 569                   | ANLQAQWAIIGEFENLPQEBELIENIQENTDPAVAVFAGAMPYASVKLSTGRPIVNHPPHYEDAGRERTRAVYQIYANRSPEDVHSILRSFGTDVYVILDSIC    | 670                                                                                                     |
|                       | <i>X. tropicalis</i>   | 488                   | SNLQSWNIKGEFENLPQEBELIENIHSNTNPGAVFAGAMPYASVKLSTGRPIVNHPPHYEDAGRERTRAVYQIYANRSPEDVHSILRSFGTDVYVILDSIC      | 589                                                                                                     |
|                       | <i>G. gallus</i>       | 532                   | ANLQQTWNIIGEFENLPQEBELIENIQVNTQDAVAVFAGAMPYASVKLSALRPVNHPPHYEDAGRERTRAVYQIYANRSPEDVHSILRSFGTDVYVILDSIC     | 633                                                                                                     |
|                       | <i>H. sapiens</i>      | 518                   | ANLQQTWNIIGEFENLPQEBELIENIKYSTKPDVAVFAGAMPYASVKLSALRPVNHPPHYEDAGRERTRAVYQIYANRSPEDVHSILRSFGTDVYVILDSIC     | 619                                                                                                     |
|                       | DPY19L1                | <i>P. troglodytes</i> | 518                                                                                                        | ANLQQTWNIIGEFENLPQEBELIENIKYSTKPDVAVFAGAMPYASVKLSALRPVNHPPHYEDAGRERTRAVYQIYANRSPEDVHSILRSFGTDVYVILDSIC  |
| <i>C. familiaris</i>  |                        | 491                   | ANLQQTWNIIGEFENLPQEBELIENIKYSTKPDVAVFAGAMPYASVKLSALRPVNHPPHYEDAGRERTRAVYQIYANRSPEDVHSILRSFGTDVYVILDSIC     | 592                                                                                                     |
| <i>B. taurus</i>      |                        | 491                   | ANLQQTWNIIGEFENLPQEBELIENIKYSTKPDVAVFAGAMPYASVKLSALRPVNHPPHYEDAGRERTRAVYQIYANRSPEDVHSILRSFGTDVYVILDSIC     | 592                                                                                                     |
| <i>M. musculus</i>    |                        | 491                   | ANLQQTWNIIGEFENLPQEBELIENIRYSTKPDVAVFAGAMPYASVKLSALRPVNHPPHYEDAGRERTRAVYQIYANRSPEDVHSILRSFGTDVYVILDSIC     | 592                                                                                                     |
| <i>R. norvegicus</i>  |                        | 491                   | ANLQQTWNIIGEFENLPQEBELIENIRYSTKPDVAVFAGAMPYASVKLSALRPVNHPPHYEDAGRERTRAVYQIYANRSPEDVHSILRSFGTDVYVILDSIC     | 592                                                                                                     |
| <i>M. domestica</i>   |                        | 491                   | ANLQHQWSIIGEFENLPQEBELIENIKFNTKPDVAVFAGAMPYASIKLSALRPVNHPPHYEDAGRERTRAVYQIYANRSPEDVHSILRSFGTDVYVILDSIC     | 592                                                                                                     |
| <i>H. sapiens</i>     |                        | 603                   | ANRNQWSIIGEFENLPQEBELIENIKYSTTSDAVAVFAGAMPYASIKLSTLHPVNHPPHYEDAGRERTRAVYQIYANRSPEDVHSILRSFGTDVYVILDSIC     | 704                                                                                                     |
| <i>P. troglodytes</i> |                        | 603                   | ANRNQWSIIGEFENLPQEBELIENIKYSTTSDAVAVFAGAMPYASIKLSTLHPVNHPPHYEDAGRERTRAVYQIYANRSPEDVHSILRSFGTDVYVILDSIC     | 704                                                                                                     |
| <i>C. familiaris</i>  |                        | 617                   | TNLHNQWSIIGEFENLPQEBELIENIKYNTRPDAVAVFAGAMPYASVKLSTLHPVNHPPHYEDAGRERTRAVYQIYANRSPEDVHSILRSFGTDVYVILDSIC    | 718                                                                                                     |
| DPY19L2               |                        | <i>B. taurus</i>      | 618                                                                                                        | ANLHNQWSIIGEFENLPQEBELIENIKYNTRPDAVAVFAGAMPYASVKLSTLHPVNHPPHYEDAGRERTRAVYQIYANRSPEDVHSILRSFGTDVYVILDSIC |
|                       | <i>M. musculus</i>     | 618                   | ANLHNQWSIIGEFENLPQEBELIENIKHSTRPDAVAVFAGAMPYASIKLSTLHPVNHPPHYEDAGRERTRAVYQIYANRSPEDVHSILRSFGTDVYVILDSIC    | 719                                                                                                     |
|                       | <i>R. norvegicus</i>   | 618                   | ANLHNQWSIIGEFENLPQEBELIENIRHNTRPDAVAVFAGAMPYASIKLSTLHPVNHPPHYEDAGRERTRAVYQIYANRSPEDVHSILRSFGTDVYVILDSIC    | 719                                                                                                     |
|                       | <i>M. domestica</i>    | 458                   | LNLQSLSIIGEFENLMPQEBELIENIKHNTRPDAVAVFACTMPYASVKLSTMRPIVNHPPHYEDAGRERTRAVYQIYANRSPEDVHSILRSFGTDVYVILDSIC   | 559                                                                                                     |
|                       |                        |                       |                                                                                                            | *** **                                                                                                  |
